# Supplementary material for: PSAMM: A Portable System for the Analysis of Metabolic Models
Source: PubMed Central journal article supplement (PMC4734835; doi:10.1371/journal.pcbi.1004732), 2016-02-01
Supplement: pcbi.1004732.s006.pdf [file pcbi.1004732.s006.pdf]

**S4 Table. Mapping from model subsystems to metabolic pathways.** The model-specific subsystem names in the first column are mapped to the metabolic pathways in the second column.

|                                                   |                       |
|---------------------------------------------------|-----------------------|
| 4 hydroxyphenylacetate catabolism                 | Amino acid metabolism |
| Alanine and Aspartate Metabolism                  | Amino acid metabolism |
| Alanine Aspartate Metabolism                      | Amino acid metabolism |
| alanine biosynthesis                              | Amino acid metabolism |
| alanine metabolism                                | Amino acid metabolism |
| alanine, aspartate and asparagine biosynthesis    | Amino acid metabolism |
| alanine, aspartate and glutamate metabolism       | Amino acid metabolism |
| alanine/aspartate and asparagine metabolism       | Amino acid metabolism |
| amino acid degradation                            | Amino acid metabolism |
| Amino Acid Metabolism                             | Amino acid metabolism |
| Amino acid, ala                                   | Amino acid metabolism |
| aminophosphonate metabolism                       | Amino acid metabolism |
| arginine and proline                              | Amino acid metabolism |
| Arginine and Proline Metabolism                   | Amino acid metabolism |
| arginine biosynthesis                             | Amino acid metabolism |
| arginine metabolism                               | Amino acid metabolism |
| arginine putriscine and spermidine metabolism     | Amino acid metabolism |
| aromatic amino acid synthesis                     | Amino acid metabolism |
| aromatic amino acids                              | Amino acid metabolism |
| asparagine degradation                            | Amino acid metabolism |
| Asparagine metabolism                             | Amino acid metabolism |
| aspartate degradation                             | Amino acid metabolism |
| aspartate metabolism                              | Amino acid metabolism |
| b-alanine metabolism                              | Amino acid metabolism |
| beta-alanine biosynthesis                         | Amino acid metabolism |
| beta-Alanine metabolism                           | Amino acid metabolism |
| cyanamino acid metabolism                         | Amino acid metabolism |
| Cyanophycin Metabolism                            | Amino acid metabolism |
| cys biosynthesis                                  | Amino acid metabolism |
| Cysteine and Methionine Metabolism                | Amino acid metabolism |
| cysteine biosynthesis                             | Amino acid metabolism |
| cysteine degradation                              | Amino acid metabolism |
| Cysteine Metabolism                               | Amino acid metabolism |
| D-alanine metabolism                              | Amino acid metabolism |
| d-alanine, d-glutamine and d-glutamate metabolism | Amino acid metabolism |
| D-arg and D-orn metabolism                        | Amino acid metabolism |
| gln biosynthesis                                  | Amino acid metabolism |
| glutamate and glutamin metabolism                 | Amino acid metabolism |
| glutamate and glutamine biosynthesis              | Amino acid metabolism |
| glutamate and glutamine metabolism                | Amino acid metabolism |
| glutamate biosynthesis                            | Amino acid metabolism |
| Glutamate Metabolism                              | Amino acid metabolism |
| glutamate metabolism (aminosugars metabolism)     | Amino acid metabolism |
| Glutamine Metabolism                              | Amino acid metabolism |

|                                                                                |                       |
|--------------------------------------------------------------------------------|-----------------------|
| Glutathione Metabolism                                                         | Amino acid metabolism |
| Glycine and Serine Metabolism                                                  | Amino acid metabolism |
| glycine metabolism                                                             | Amino acid metabolism |
| Glycine Serine and Threonine Metabolism                                        | Amino acid metabolism |
| glycine serine threonine metabolism                                            | Amino acid metabolism |
| Glycine, Serine and threonine metabolism                                       | Amino acid metabolism |
| glycine, serine, alanine and threonine metabolism                              | Amino acid metabolism |
| Glycine, Serine, and Threonine Metabolism                                      | Amino acid metabolism |
| histidine biosynthesis                                                         | Amino acid metabolism |
| histidine degradation                                                          | Amino acid metabolism |
| Histidine Metabolism                                                           | Amino acid metabolism |
| homoserine biosynthesis                                                        | Amino acid metabolism |
| ile metabolism                                                                 | Amino acid metabolism |
| isoleucine biosynthesis                                                        | Amino acid metabolism |
| leucine degradation                                                            | Amino acid metabolism |
| lysine biosynthesis                                                            | Amino acid metabolism |
| lysine degradation                                                             | Amino acid metabolism |
| Lysine Metabolism                                                              | Amino acid metabolism |
| lysine/ threonine biosynthesis                                                 | Amino acid metabolism |
| methionine and cysteine metabolism                                             | Amino acid metabolism |
| methionine biosynthesis                                                        | Amino acid metabolism |
| Methionine Metabolism                                                          | Amino acid metabolism |
| methionine salvage pathway                                                     | Amino acid metabolism |
| Other Amino Acid Metabolism                                                    | Amino acid metabolism |
| phenylalanine biosynthesis                                                     | Amino acid metabolism |
| Phenylalanine Metabolism                                                       | Amino acid metabolism |
| phenylalanine tyrosine and tryptophan biosynthesis                             | Amino acid metabolism |
| phenylalanine tyrosine tryptophan biosynthesis                                 | Amino acid metabolism |
| Phenylalanine Tyrosine Tryptophan Metabolism                                   | Amino acid metabolism |
| phenylalanine, tyrosine and tryptophan biosynthesis                            | Amino acid metabolism |
| phenylalanine, tyrosine and tryptophan biosynthesis<br>(aromatic amino acids)  | Amino acid metabolism |
| phenylalanine, tyrosine, and tryptophan biosynthesis<br>(aromatic amino acids) | Amino acid metabolism |
| phenylalanine, tyrosine, tryptophan biosynthesis                               | Amino acid metabolism |
| phenylalanine/phenylacetate degradation                                        | Amino acid metabolism |
| polyamine synthesis                                                            | Amino acid metabolism |
| Proline Biosynthesis                                                           | Amino acid metabolism |
| proline degradation                                                            | Amino acid metabolism |
| proline synthesis                                                              | Amino acid metabolism |
| Selenoamino acid metabolism                                                    | Amino acid metabolism |
| ser, gly biosynthesis                                                          | Amino acid metabolism |
| serine metabolism                                                              | Amino acid metabolism |
| serine, glycine and threonine biosynthesis                                     | Amino acid metabolism |
| shikimate cycle                                                                | Amino acid metabolism |
| sulfur cysteine and methionine metabolism                                      | Amino acid metabolism |
| Taurine and hypotaurine metabolism                                             | Amino acid metabolism |
| Taurine Metabolism                                                             | Amino acid metabolism |
| Thiamine Metabolism                                                            | Amino acid metabolism |
| Threonine and Lysine Metabolism                                                | Amino acid metabolism |

|                                                    |                       |
|----------------------------------------------------|-----------------------|
| threonine and serine degradation                   | Amino acid metabolism |
| threonine metabolism                               | Amino acid metabolism |
| tryptophan biosynthesis                            | Amino acid metabolism |
| tryptophan degradation                             | Amino acid metabolism |
| Tryptophan metabolism                              | Amino acid metabolism |
| Tyr, Phe, Trp Biosynthesis                         | Amino acid metabolism |
| tyrosine biosynthesis                              | Amino acid metabolism |
| tyrosine degradation                               | Amino acid metabolism |
| Tyrosine metabolism                                | Amino acid metabolism |
| Tyrosine Tryptophan and Phenylalanine Metabolism   | Amino acid metabolism |
| Tyrosine, Tryptophan, and Phenylalanine Metabolism | Amino acid metabolism |
| Urea Cycle                                         | Amino acid metabolism |
| Urea Cycle and Amino Acid Metabolisms              | Amino acid metabolism |
| urea cycle and metabolism of amino groups          | Amino acid metabolism |
| Urea cycle/amino group metabolism                  | Amino acid metabolism |
| val metabolism                                     | Amino acid metabolism |
| valine and leucine biosynthesis                    | Amino acid metabolism |
| valine leucine and isoleucine biosynthesis         | Amino acid metabolism |
| Valine Leucine and Isoleucine Metabolism           | Amino acid metabolism |
| valine leucine isoleucine metabolism               | Amino acid metabolism |
| valine, leucine and isoleucine biosynthesis        | Amino acid metabolism |
| valine, leucine and isoleucine degradation         | Amino acid metabolism |
| valine, leucine, and isoleucine biosynthesis       | Amino acid metabolism |
| valine, leucine, and isoleucine degradation        | Amino acid metabolism |
| Valine, Leucine, and Isoleucine Metabolism         | Amino acid metabolism |
| 1 2 Propanediol Catabolism                         | Carbon metabolism     |
| 3-hydroxybenzoate degradation                      | Carbon metabolism     |
| acetate/acetaldehyde/ethanol metabolism            | Carbon metabolism     |
| Alternate Carbon Metabolism                        | Carbon metabolism     |
| Alternate Carbon source                            | Carbon metabolism     |
| Amino Sugar and Nucleotide Sugar Metabolism        | Carbon metabolism     |
| Aminosugar Metabolism                              | Carbon metabolism     |
| aminosugars metabolism                             | Carbon metabolism     |
| Anaplerotic Reactions                              | Carbon metabolism     |
| Anaplerotic reactions                              | Carbon metabolism     |
| Arabinose Metabolism                               | Carbon metabolism     |
| Aromatic Acid Breakdown                            | Carbon metabolism     |
| Ascorbate and Aldarate Metabolism                  | Carbon metabolism     |
| Benzoate degradation                               | Carbon metabolism     |
| Butanoate Metabolism                               | Carbon metabolism     |
| C5 Branched dibasic acid metabolism                | Carbon metabolism     |
| C5-Branched dibasic acid metabolism                | Carbon metabolism     |
| c5-branched dibasic acid metabolism                | Carbon metabolism     |
| Carbohydrate Metabolism                            | Carbon metabolism     |
| Carbon Fixation                                    | Carbon metabolism     |
| Central Metabolism                                 | Carbon metabolism     |
| Citrate Cycle (TCA)                                | Carbon metabolism     |
| Citrate Cycle TCA                                  | Carbon metabolism     |
| Citric Acid Cycle                                  | Carbon metabolism     |
| Complex Alcohol Metabolism                         | Carbon metabolism     |

|                                                |                                   |
|------------------------------------------------|-----------------------------------|
| flourene degradation                           | Carbon metabolism                 |
| Fructose and mannose metabolism                | Carbon metabolism                 |
| Galactose metabolism                           | Carbon metabolism                 |
| Glucosamine Metabolism                         | Carbon metabolism                 |
| Glycolysis                                     | Carbon metabolism                 |
| Glycolysis/Gluconeogenesis                     | Carbon metabolism                 |
| GlycolysisGluconeogenesis                      | Carbon metabolism                 |
| Glyoxylate and Dicarboxylate Metabolism        | Carbon metabolism                 |
| Glyoxylate Metabolism                          | Carbon metabolism                 |
| Inositol Metabolism                            | Carbon metabolism                 |
| Inositol Phosphate Metabolism                  | Carbon metabolism                 |
| Mannitol Metabolism                            | Carbon metabolism                 |
| methylcitrate cycle                            | Carbon metabolism                 |
| Methylglyoxal Metabolism                       | Carbon metabolism                 |
| Nucleotide Sugar Metabolism                    | Carbon metabolism                 |
| one carbon metabolism                          | Carbon metabolism                 |
| one carbon pool by folate                      | Carbon metabolism                 |
| pentose and glucoronate interconverstion       | Carbon metabolism                 |
| Pentose and Glucuronate Interconversions       | Carbon metabolism                 |
| Pentose Phosphate Pathway                      | Carbon metabolism                 |
| Photosynthesis                                 | Carbon metabolism                 |
| Propanoate Metabolism                          | Carbon metabolism                 |
| Pyruvate Metabolism                            | Carbon metabolism                 |
| Pyruvate metabolism                            | Carbon metabolism                 |
| Starch and Sucrose Metabolism                  | Carbon metabolism                 |
| Sugar Metabolism                               | Carbon metabolism                 |
| Xylose Metabolism                              | Carbon metabolism                 |
| biotin biosynthesis                            | Cofactors and vitamins metabolism |
| Biotin Metabolism                              | Cofactors and vitamins metabolism |
| CoA Biosynthesis                               | Cofactors and vitamins metabolism |
| CoA Catabolism                                 | Cofactors and vitamins metabolism |
| coa synthesis                                  | Cofactors and vitamins metabolism |
| Coenzyme A Biosynthesis                        | Cofactors and vitamins metabolism |
| Coenzyme B Biosynthesis                        | Cofactors and vitamins metabolism |
| Coenzyme M Biosynthesis                        | Cofactors and vitamins metabolism |
| Cofactor and Prosthetic Group Biosynthesis     | Cofactors and vitamins metabolism |
| Cofactor and Prosthetic Group Biosynthesis     | Cofactors and vitamins metabolism |
| Cofactor Metabolism                            | Cofactors and vitamins metabolism |
| Cofactors and vitamins metabolism Biosynthesis | Cofactors and vitamins metabolism |
| CYP Metabolism                                 | Cofactors and vitamins metabolism |
| folate biosynthesis                            | Cofactors and vitamins metabolism |
| Folate Metabolism                              | Cofactors and vitamins metabolism |
| folate one-carbon pool                         | Cofactors and vitamins metabolism |
| folate synthesis                               | Cofactors and vitamins metabolism |
| Heme Biosynthesis                              | Cofactors and vitamins metabolism |
| Heme Degradation                               | Cofactors and vitamins metabolism |
| heme synthesis                                 | Cofactors and vitamins metabolism |
| nad and nadp biosynthesis                      | Cofactors and vitamins metabolism |
| nad and nadp conversion                        | Cofactors and vitamins metabolism |
| NAD Biosynthesis                               | Cofactors and vitamins metabolism |

|                                            |                                   |
|--------------------------------------------|-----------------------------------|
| NAD Metabolism                             | Cofactors and vitamins metabolism |
| nadp and nad degradation                   | Cofactors and vitamins metabolism |
| nicotinate and nicotinamide                | Cofactors and vitamins metabolism |
| nicotinate and nicotinamide biosynthesis   | Cofactors and vitamins metabolism |
| Nicotinate and Nicotinamide Metabolism     | Cofactors and vitamins metabolism |
| nicotinate biosynthesis                    | Cofactors and vitamins metabolism |
| nicotinic acid pathway                     | Cofactors and vitamins metabolism |
| nicotinic acid synthesis from trp          | Cofactors and vitamins metabolism |
| Pantothenate and CoA Biosynthesis          | Cofactors and vitamins metabolism |
| Pantothenate and CoA Metabolism            | Cofactors and vitamins metabolism |
| Phylloquinone Biosynthesis                 | Cofactors and vitamins metabolism |
| Plastoquinone Biosynthesis                 | Cofactors and vitamins metabolism |
| Polyprenyl Metabolism                      | Cofactors and vitamins metabolism |
| Porphyrin and Chlorophyll Metabolism       | Cofactors and vitamins metabolism |
| Porphyrin Metabolism                       | Cofactors and vitamins metabolism |
| Pyridoxine Metabolism                      | Cofactors and vitamins metabolism |
| Quinone Biosynthesis                       | Cofactors and vitamins metabolism |
| Riboflavin Metabolism                      | Cofactors and vitamins metabolism |
| Tetrahydramethanopterin Biosynthesis       | Cofactors and vitamins metabolism |
| Tetrahydrobiopterin                        | Cofactors and vitamins metabolism |
| tetrahydrobiopterin metabolism             | Cofactors and vitamins metabolism |
| thf metabolism                             | Cofactors and vitamins metabolism |
| thiamin biosynthesis                       | Cofactors and vitamins metabolism |
| thiamine (vitamin b1) metabolism           | Cofactors and vitamins metabolism |
| thiamine biosynthesis                      | Cofactors and vitamins metabolism |
| Ubiquinone Biosynthesis                    | Cofactors and vitamins metabolism |
| Ubiquinone Metabolism                      | Cofactors and vitamins metabolism |
| ubiquinone synthesis                       | Cofactors and vitamins metabolism |
| Vitamin A Metabolism                       | Cofactors and vitamins metabolism |
| Vitamin B12 Metabolism                     | Cofactors and vitamins metabolism |
| vitamin b2 metabolism                      | Cofactors and vitamins metabolism |
| Vitamin B6 Metabolism                      | Cofactors and vitamins metabolism |
| vitamin c metabolism                       | Cofactors and vitamins metabolism |
| Vitamin D                                  | Cofactors and vitamins metabolism |
| vitamin d metabolism                       | Cofactors and vitamins metabolism |
| vitamin e metabolism                       | Cofactors and vitamins metabolism |
| Vitamins & Cofactor Biosynthesis           | Cofactors and vitamins metabolism |
| cytochrome metabolism                      | Energy metabolism                 |
| Energy Metabolism                          | Energy metabolism                 |
| Hydrogen Metabolism                        | Energy metabolism                 |
| Methane Metabolism                         | Energy metabolism                 |
| Methanogenesis                             | Energy metabolism                 |
| Nitrogen Metabolism                        | Energy metabolism                 |
| Oxidative Phosphorylation                  | Energy metabolism                 |
| Redox Metabolism                           | Energy metabolism                 |
| ros detoxification                         | Energy metabolism                 |
| Sulfur Metabolism                          | Energy metabolism                 |
| Blood Group Biosynthesis                   | Glycan metabolism                 |
| blood group synthesis                      | Glycan metabolism                 |
| Chondroitin / heparan sulfate biosynthesis | Glycan metabolism                 |

|                                                        |                   |
|--------------------------------------------------------|-------------------|
| Chondroitin sulfate degradation                        | Glycan metabolism |
| chondroitin synthesis                                  | Glycan metabolism |
| glycan biosynthesis                                    | Glycan metabolism |
| Glycoprotein Metabolism                                | Glycan metabolism |
| Glycosylphosphatidylinositol (GPI)-anchor biosynthesis | Glycan metabolism |
| Heparan sulfate degradation                            | Glycan metabolism |
| high-mannose type n-glycan biosynthesis                | Glycan metabolism |
| Hyaluronan Metabolism                                  | Glycan metabolism |
| Keratan sulfate biosynthesis                           | Glycan metabolism |
| Keratan sulfate degradation                            | Glycan metabolism |
| keratan sulfate synthesis                              | Glycan metabolism |
| Lipopolysaccharide Biosynthesis                        | Glycan metabolism |
| Lipopolysaccharide Biosynthesis / Recycling            | Glycan metabolism |
| Lipopolysaccharide Biosynthesis Recycling              | Glycan metabolism |
| Murein Biosynthesis                                    | Glycan metabolism |
| Murein lpp biosynthesis                                | Glycan metabolism |
| Murein Recycling                                       | Glycan metabolism |
| N-Glycan Biosynthesis                                  | Glycan metabolism |
| N-Glycan Degradation                                   | Glycan metabolism |
| n-glycan metabolism                                    | Glycan metabolism |
| n-glycan synthesis                                     | Glycan metabolism |
| O-Glycan Biosynthesis                                  | Glycan metabolism |
| o-glycan synthesis                                     | Glycan metabolism |
| O6 antigen synthesis                                   | Glycan metabolism |
| other glycan degradation                               | Glycan metabolism |
| Peptidoglycan Biosynthesis                             | Glycan metabolism |
| Peptidoglycan Metabolism                               | Glycan metabolism |
| phosphatidylinositol phosphate metabolism              | Glycan metabolism |
| alpha-linolenic acid metabolism                        | Lipid metabolism  |
| arachidonic acid metabolism                            | Lipid metabolism  |
| Bile Acid Biosynthesis                                 | Lipid metabolism  |
| bile acid synthesis                                    | Lipid metabolism  |
| biosynthesis of unsaturated fatty acids                | Lipid metabolism  |
| biosynthesis of very long fatty acids                  | Lipid metabolism  |
| Carnitine shuttle                                      | Lipid metabolism  |
| Cell Envelope Biosynthesis                             | Lipid metabolism  |
| Cholesterol Metabolism                                 | Lipid metabolism  |
| Fatty Acid Biosynthesis                                | Lipid metabolism  |
| Fatty acid activation                                  | Lipid metabolism  |
| Fatty Acid Biosynthesis                                | Lipid metabolism  |
| Fatty Acid Degradation                                 | Lipid metabolism  |
| Fatty acid elongation                                  | Lipid metabolism  |
| Fatty Acid Metabolism                                  | Lipid metabolism  |
| Fatty acid oxidation                                   | Lipid metabolism  |
| Fatty acid oxidation, peroxisome                       | Lipid metabolism  |
| Fatty Acid Synthesis                                   | Lipid metabolism  |
| Glycerolipid Metabolism                                | Lipid metabolism  |
| Glycerophospholipid Metabolism                         | Lipid metabolism  |
| Glycosphingolipid metabolism                           | Lipid metabolism  |
| linoleate metabolism                                   | Lipid metabolism  |

|                                                         |                                      |
|---------------------------------------------------------|--------------------------------------|
| Lipid & Cell Wall Metabolism                            | Lipid metabolism                     |
| lipid and cell wall metabolism                          | Lipid metabolism                     |
| lipid biosynthesis                                      | Lipid metabolism                     |
| lipid biosynthesis proteins                             | Lipid metabolism                     |
| Lipid Metabolism                                        | Lipid metabolism                     |
| lipoate metabolism                                      | Lipid metabolism                     |
| Membrane Lipid Metabolism                               | Lipid metabolism                     |
| Membrane Metabolism                                     | Lipid metabolism                     |
| Phospholipid Biosynthesis                               | Lipid metabolism                     |
| phospholipid degradation                                | Lipid metabolism                     |
| Phospholipid Metabolism                                 | Lipid metabolism                     |
| Sphingolipid Metabolism                                 | Lipid metabolism                     |
| squalene and cholesterol synthesis                      | Lipid metabolism                     |
| Steroid Metabolism                                      | Lipid metabolism                     |
| Sterol Biosynthesis                                     | Lipid metabolism                     |
| Sterol Metabolism                                       | Lipid metabolism                     |
| synthesis of unsaturated fatty acids                    | Lipid metabolism                     |
| Triacylglycerol Synthesis                               | Lipid metabolism                     |
| atp de novo synthesis                                   | Nucleic acid metabolism              |
| IMP Biosynthesis                                        | Nucleic acid metabolism              |
| Nucleic acid degradation                                | Nucleic acid metabolism              |
| nucleotide interconversion                              | Nucleic acid metabolism              |
| Nucleotide Metabolism                                   | Nucleic acid metabolism              |
| Nucleotide Salvage Pathway                              | Nucleic acid metabolism              |
| Nucleotide Salvage Pathways                             | Nucleic acid metabolism              |
| Nucleotides                                             | Nucleic acid metabolism              |
| Purine and Pyrimidine Biosynthesis                      | Nucleic acid metabolism              |
| Purine and Pyrimidine Metabolism                        | Nucleic acid metabolism              |
| Purine Catabolism                                       | Nucleic acid metabolism              |
| Purine Metabolism                                       | Nucleic acid metabolism              |
| Purine Metabolism, Transport                            | Nucleic acid metabolism              |
| purine synthesis                                        | Nucleic acid metabolism              |
| Pyrimidine Biosynthesis                                 | Nucleic acid metabolism              |
| Pyrimidine Catabolism                                   | Nucleic acid metabolism              |
| Pyrimidine Metabolism                                   | Nucleic acid metabolism              |
| pyrimidine synthesis                                    | Nucleic acid metabolism              |
| tRNA Charging                                           | Nucleic acid metabolism              |
| alkaloid biosynthesis i                                 | Secondary and Xenobiotics metabolism |
| Alkaloid biosynthesis II                                | Secondary and Xenobiotics metabolism |
| alkaloid synthesis                                      | Secondary and Xenobiotics metabolism |
| androgen and estrogen synthesis and metabolism          | Secondary and Xenobiotics metabolism |
| biosynthesis of siderophore group nonribosomal peptides | Secondary and Xenobiotics metabolism |
| biosynthesis of siderophore group nonribosomal peptides | Secondary and Xenobiotics metabolism |
| Carotenoid Biosynthesis                                 | Secondary and Xenobiotics metabolism |
| Eicosanoid Metabolism                                   | Secondary and Xenobiotics metabolism |
| Limonene and pinene degradation                         | Secondary and Xenobiotics metabolism |
| penicillin breakdown                                    | Secondary and Xenobiotics metabolism |
| penicillin biosynthesis                                 | Secondary and Xenobiotics metabolism |
| Stilbene, coumarine and lignin biosynthesis             | Secondary and Xenobiotics metabolism |
| stilbene, coumarine and lignin synthesis                | Secondary and Xenobiotics metabolism |

|                                                                  |                                      |
|------------------------------------------------------------------|--------------------------------------|
| Terpenoid Backbone Biosynthesis                                  | Secondary and Xenobiotics metabolism |
| tropane, piperidine and pyridine alkaloid biosynthesis           | Secondary and Xenobiotics metabolism |
| xenobiotics metabolism                                           | Secondary and Xenobiotics metabolism |
| carrier-mediated transport across the cytoplasmatic membrane     | Transport and exchange               |
| carrier-mediated transport across the mitochondrial membrane     | Transport and exchange               |
| er transport                                                     | Transport and exchange               |
| Exchange                                                         | Transport and exchange               |
| exchange reactions                                               | Transport and exchange               |
| exchange/demand reaction                                         | Transport and exchange               |
| golgi transport                                                  | Transport and exchange               |
| golgi trasnport                                                  | Transport and exchange               |
| Inorganic Ion Transport and Metabolism                           | Transport and exchange               |
| mitochondrial transport                                          | Transport and exchange               |
| non-carrier-mediated transport across the cytoplasmatic membrane | Transport and exchange               |
| non-carrier-mediated transport across the mitochondrial membrane | Transport and exchange               |
| peroxisomal transport                                            | Transport and exchange               |
| peroxisomal transport                                            | Transport and exchange               |
| peroxisomal trasnport                                            | Transport and exchange               |
| putative transporters                                            | Transport and exchange               |
| Tranport                                                         | Transport and exchange               |
| Tranport, Inner Membrane                                         | Transport and exchange               |
| Tranpsort, Inner Membrane                                        | Transport and exchange               |
| Transport                                                        | Transport and exchange               |
| Transport Endoplasmic Reticular                                  | Transport and exchange               |
| Transport Extracellular                                          | Transport and exchange               |
| Transport Golgi Apparatus                                        | Transport and exchange               |
| Transport Inner Membrane                                         | Transport and exchange               |
| Transport Mitochondrial                                          | Transport and exchange               |
| Transport Nuclear                                                | Transport and exchange               |
| transport of fab                                                 | Transport and exchange               |
| Transport Outer Membrane                                         | Transport and exchange               |
| Transport Outer Membrane Porin                                   | Transport and exchange               |
| Transport Peroxisomal                                            | Transport and exchange               |
| transport plasma membrane                                        | Transport and exchange               |
| transport reaction                                               | Transport and exchange               |
| Transport Vacuolar                                               | Transport and exchange               |
| transport, abc system                                            | Transport and exchange               |
| Transport, Endoplasmic Reticular                                 | Transport and exchange               |
| Transport, Extracellular                                         | Transport and exchange               |
| Transport, Golgi Apparatus                                       | Transport and exchange               |
| Transport, Inner Membrane                                        | Transport and exchange               |
| Transport, Lysosomal                                             | Transport and exchange               |
| Transport, Mitochondrial                                         | Transport and exchange               |
| transport, mitochondrial membrane                                | Transport and exchange               |
| Transport, Nuclear                                               | Transport and exchange               |
| Transport, Outer Membrane                                        | Transport and exchange               |
| Transport, Outer Membrane Porin                                  | Transport and exchange               |
| Transport, Peroxisomal                                           | Transport and exchange               |
| transport, peroxisomal membrane                                  | Transport and exchange               |
| transport, plasma membrane                                       | Transport and exchange               |



|                                                  |                        |
|--------------------------------------------------|------------------------|
| transport, plasma membrane (alcohols and acids)  | Transport and exchange |
| transport, plasma membrane (amino acids)         | Transport and exchange |
| transport, plasma membrane (carbohydrates)       | Transport and exchange |
| transport, plasma membrane (nucleotides)         | Transport and exchange |
| transport, plasma membrane (other compounds)     | Transport and exchange |
| Transport, Vacuolar                              | Transport and exchange |
| vacuolar transport                               | Transport and exchange |
| vacuolar transport                               | Transport and exchange |
| --                                               | Unassigned             |
| .                                                | Unassigned             |
| Biomass                                          | Unassigned             |
| biomass composition                              | Unassigned             |
| biomass formation                                | Unassigned             |
| biomass production                               | Unassigned             |
| biomass reactions - biomass formation            | Unassigned             |
| biomass reactions - cell wall composition        | Unassigned             |
| biomass reactions - dna formation                | Unassigned             |
| biomass reactions - lipids                       | Unassigned             |
| biomass reactions - protein formation            | Unassigned             |
| biomass reactions - rna formation                | Unassigned             |
| biomass reactions - small molecules pool         | Unassigned             |
| biomassobjective                                 | Unassigned             |
| blankfield                                       | Unassigned             |
| demand                                           | Unassigned             |
| dietary fiber binding                            | Unassigned             |
| general reaction                                 | Unassigned             |
| Growth                                           | Unassigned             |
| growthrate                                       | Unassigned             |
| Macromolecule Synthesis                          | Unassigned             |
| maintenance                                      | Unassigned             |
| maintenance requirements (non-growth associated) | Unassigned             |
| metabolic pathways                               | Unassigned             |
| Miscellaneous                                    | Unassigned             |
| n - others                                       | Unassigned             |
| None                                             | Unassigned             |
| Other                                            | Unassigned             |
| Others                                           | Unassigned             |
| putative                                         | Unassigned             |
| R Group Synthesis                                | Unassigned             |
| Salvage Pathway                                  | Unassigned             |
| spontaneous                                      | Unassigned             |
| Translation                                      | Unassigned             |
| Unassigned                                       | Unassigned             |
| Unknown                                          | Unassigned             |
