# Supplementary material for: PSAMM: A Portable System for the Analysis of Metabolic Models
Source: PubMed Central journal article supplement (PMC4734835; doi:10.1371/journal.pcbi.1004732), 2016-02-01
Supplement: pcbi.1004732.s009.pdf [file pcbi.1004732.s009.pdf]

**S3 Text:** Comparison of the original version and the fixed version of the model iRsp1095 [66] model using the *git diff* function in the Git version control system. The original version cannot provide a non-zero flux in FBA simulations, while the fixed version can. This was determined to be due to the all of the exchange reactions being set to have a lower bound of zero thus preventing uptake of any nutrients. The exchange reactions were altered to reflect the boundary conditions stated in the supplemental materials of the original paper [66]. The lines are color coded to highlight the changes between the two versions. Highlighted in red are the lines removed, and highlighted in green are the lines added from the original version to the new version.

```
diff --git a/sbml/iRsp1095/medium.yaml b/sbml/iRsp1095/medium.yaml
index a6acaca..7c6d0d7 100644
--- a/sbml/iRsp1095/medium.yaml
+++ b/sbml/iRsp1095/medium.yaml
@@ -51,7 +51,7 @@ compounds:
  lower: 0
- id: CPD0829
  reaction: RXN0192
- lower: 0
+ lower: -1000
- id: CPD0835
  reaction: RXN0193
  lower: 0
@@ -63,7 +63,7 @@ compounds:
  lower: 0
- id: CPD0730
  reaction: RXN0196
- lower: 0
+ lower: -1000
- id: CPD0732
  reaction: RXN0197
  lower: 0
@@ -111,7 +111,7 @@ compounds:
  lower: 0
- id: CPD0771
  reaction: RXN0213
- lower: 0
+ lower: -1000
- id: CPD0773
  reaction: RXN0214
  lower: 0
@@ -126,7 +126,7 @@ compounds:
  lower: 0
- id: CPD0875
  reaction: RXN0219
- lower: 0
+ lower: -1000
- id: CPD0878
  reaction: RXN0220
  lower: 0
@@ -138,7 +138,7 @@ compounds:
  lower: 0
- id: CPD0885
  reaction: RXN0223
- lower: 0
+ lower: -1000
  lower: 0
- id: CPD0829
  reaction: RXN0192
- lower: 0
+ lower: -1000
- id: CPD0835
```

```
reaction: RXN0193
lower: 0
@@ -63,7 +63,7 @@ compounds:
lower: 0
- id: CPD0730
reaction: RXN0196
- lower: 0
+ lower: -1000
- id: CPD0732
reaction: RXN0197
lower: 0
@@ -111,7 +111,7 @@ compounds:
lower: 0
- id: CPD0771
reaction: RXN0213
- lower: 0
+ lower: -1000
- id: CPD0773
reaction: RXN0214
lower: 0
@@ -126,7 +126,7 @@ compounds:
lower: 0
- id: CPD0875
reaction: RXN0219
- lower: 0
+ lower: -1000
- id: CPD0878
reaction: RXN0220
lower: 0
@@ -138,7 +138,7 @@ compounds:
lower: 0
- id: CPD0885
reaction: RXN0223
- lower: 0
+ lower: -1000
- id: CPD0887
reaction: RXN0224
lower: 0
@@ -189,7 +189,7 @@ compounds:
lower: 0
- id: CPD1074
reaction: RXN1101
- lower: 0
+ lower: -1000
- id: CPD1076
reaction: RXN1104
lower: 0
@@ -243,7 +243,7 @@ compounds:
lower: 0
- id: CPD1114
reaction: RXN1158
- lower: 0
+ lower: -1000
- id: CPD1116
reaction: RXN1161
lower: 0
@@ -378,10 +378,10 @@ compounds:
lower: 0
- id: CPD1211
reaction: RXN1326
- lower: 0
```

```
+ lower: -1000
- id: CPD1213
  reaction: RXN1329
- lower: 0
+ lower: -1000
- id: CPD1214
  reaction: RXN1331
  lower: 0
@@ -393,7 +393,7 @@ compounds:
  lower: 0
- id: CPD0734
  reaction: RXN1354
- lower: 0
+ lower: -1000
- id: CPD1231
  reaction: RXN1359
  lower: 0
```
